# Supplementary figures and images for: The Conifer Root and Stem Rot Pathogen (Heterobasidion parviporum): Effectome Analysis and Roles in Interspecific Fungal Interactions
Source: MDPI journal article supplement (doi:10.3390/microorganisms7120658), 2019-12-05

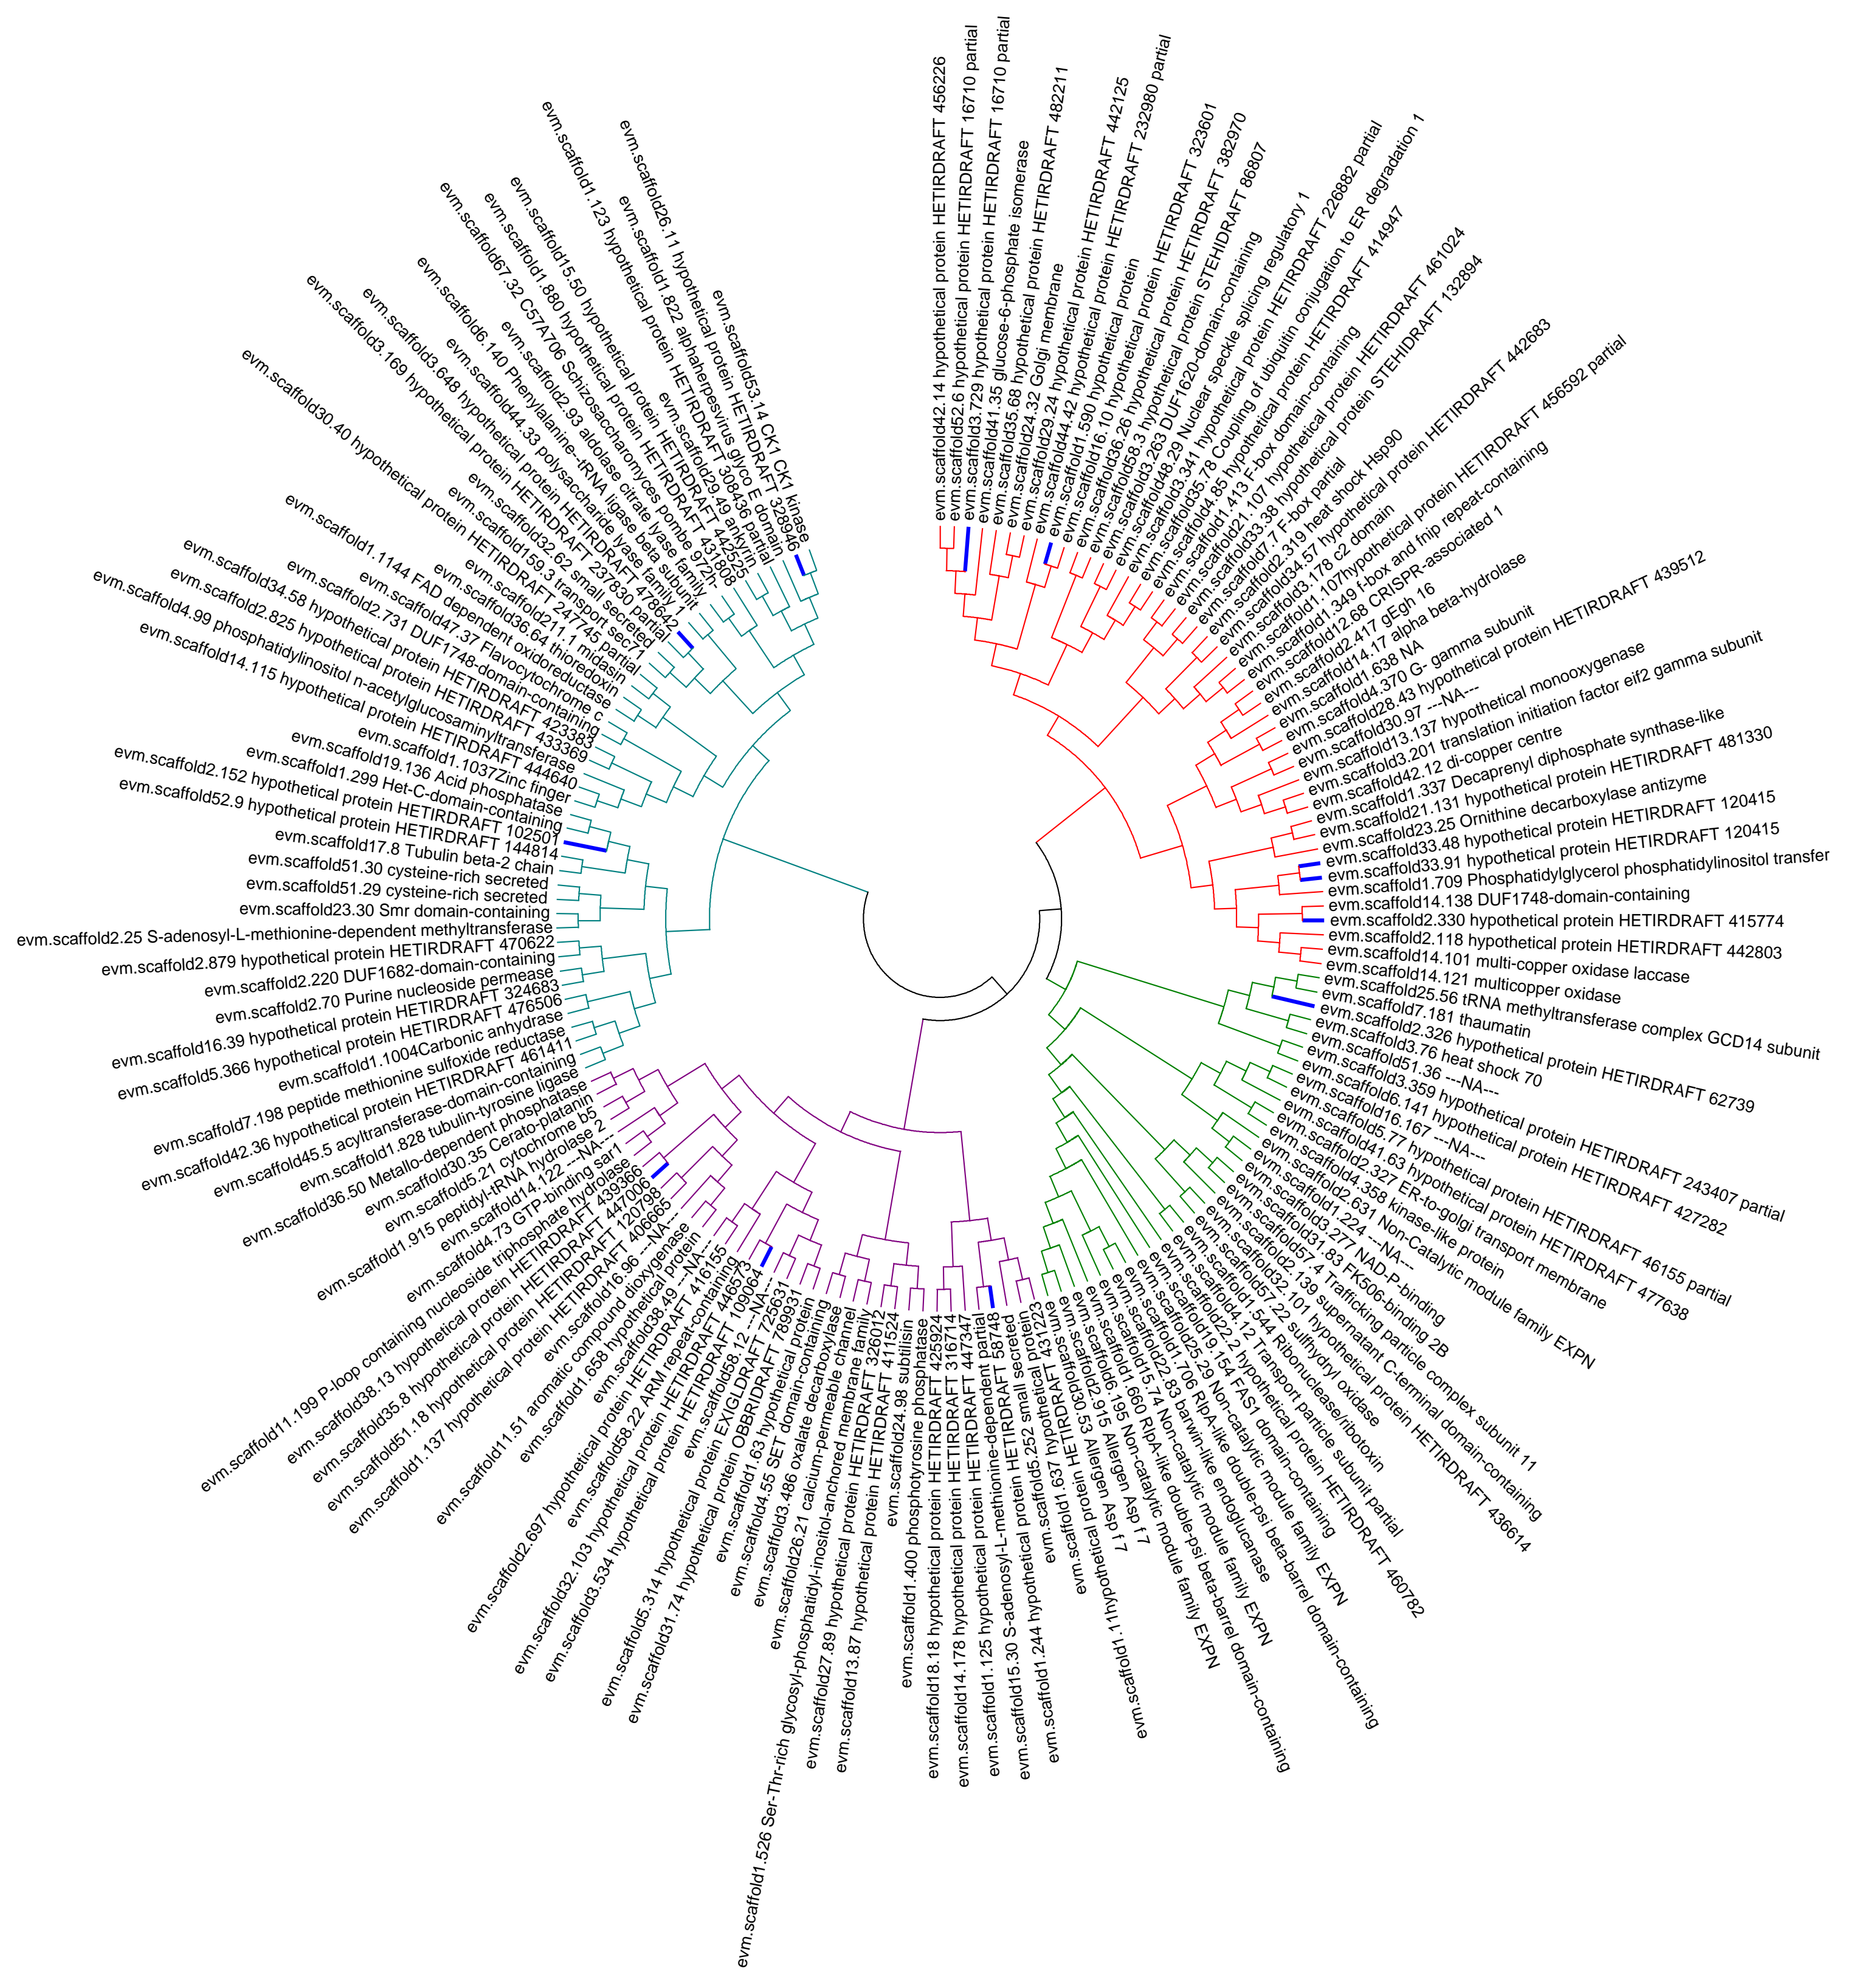

Supplement: s1 [file s1]
